# Supplementary material for: How Well Do Molecular and Pedigree Relatedness Correspond, in Populations with Diverse Mating Systems, and Various Types and Quantities of Molecular and Demographic Data?
Source: Oxford University Press journal article supplement (doi:10.1534/g3.115.019323), 2015-07-02
Supplement: 019323_figures3.pdf [file 019323_figures3.pdf]

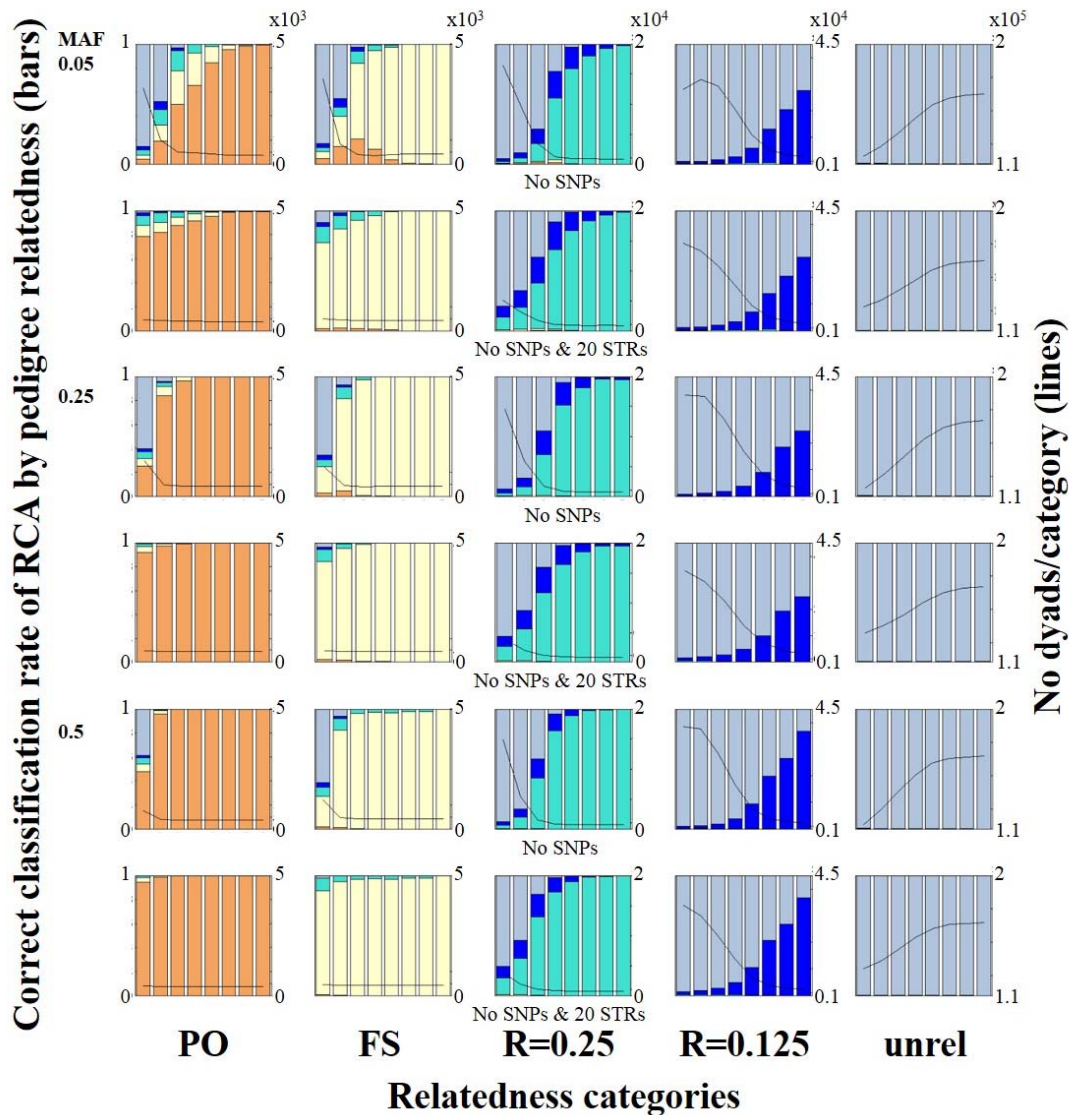

**Figure S3:** 50 000 SNP loci/monogamy: correct classification rates of relatedness category assignment (RCA) in a monogamous population (results of a single simulation shown). Three different minor allele frequencies (MAF) for SNPs, eight different number (No) of SNP loci (individual bars from left to right: 50, 100, 200, 400, 800, 1600, 3200, 50 000) and a combination of SNP with 20 STR loci were simulated. On the left vertical axes, the proportion of the correct pedigree relatedness color in each category (PO: parent-offspring; FS: full sibs; unrel: unrelated) indicates the correct classification rate of the category-assignment based on the genetic loci. Other colors indicate source of erroneously assigned categories. The right vertical axes, and the lines, indicate the number of dyads that were assigned to each category (the true number of dyads can be inferred where almost 100% correct classification rates were achieved). The orders of magnitude at the top of the No dyads/category scale of the first row applies to all No dyads/category scales below it.
