# Supplementary material for: How Well Do Molecular and Pedigree Relatedness Correspond, in Populations with Diverse Mating Systems, and Various Types and Quantities of Molecular and Demographic Data?
Source: Oxford University Press journal article supplement (doi:10.1534/g3.115.019323), 2015-07-02
Supplement: 019323_figures5.pdf [file 019323_figures5.pdf]

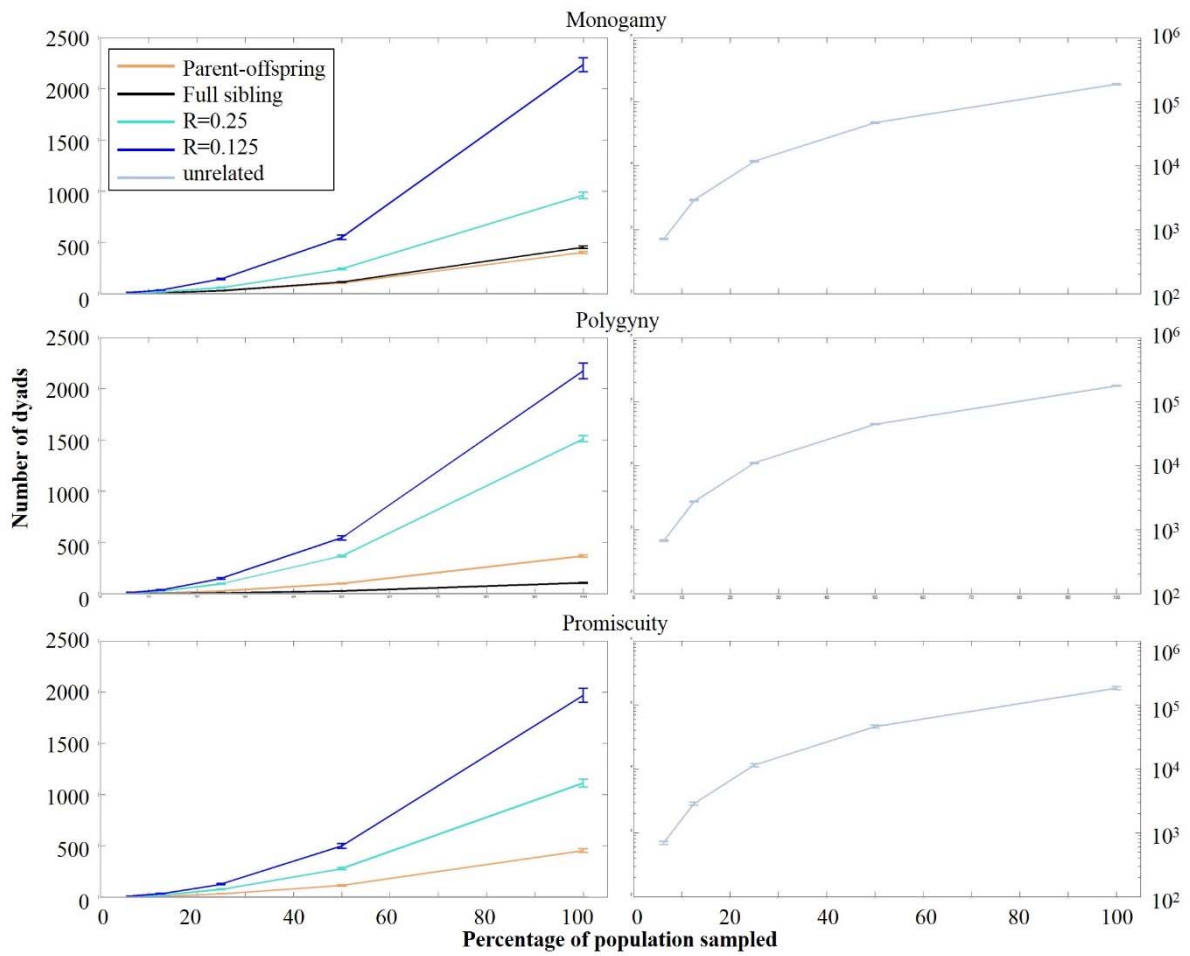

**Figure S5:** Number of pedigree dyads in subsamples of the population. Error bars indicate standard errors across 10 independent simulations. Note the log scale for plots containing the results of unrelated dyads.
