# Supplementary material for: How Well Do Molecular and Pedigree Relatedness Correspond, in Populations with Diverse Mating Systems, and Various Types and Quantities of Molecular and Demographic Data?
Source: Oxford University Press journal article supplement (doi:10.1534/g3.115.019323), 2015-07-02
Supplement: 019323_figures6.pdf [file 019323_figures6.pdf]

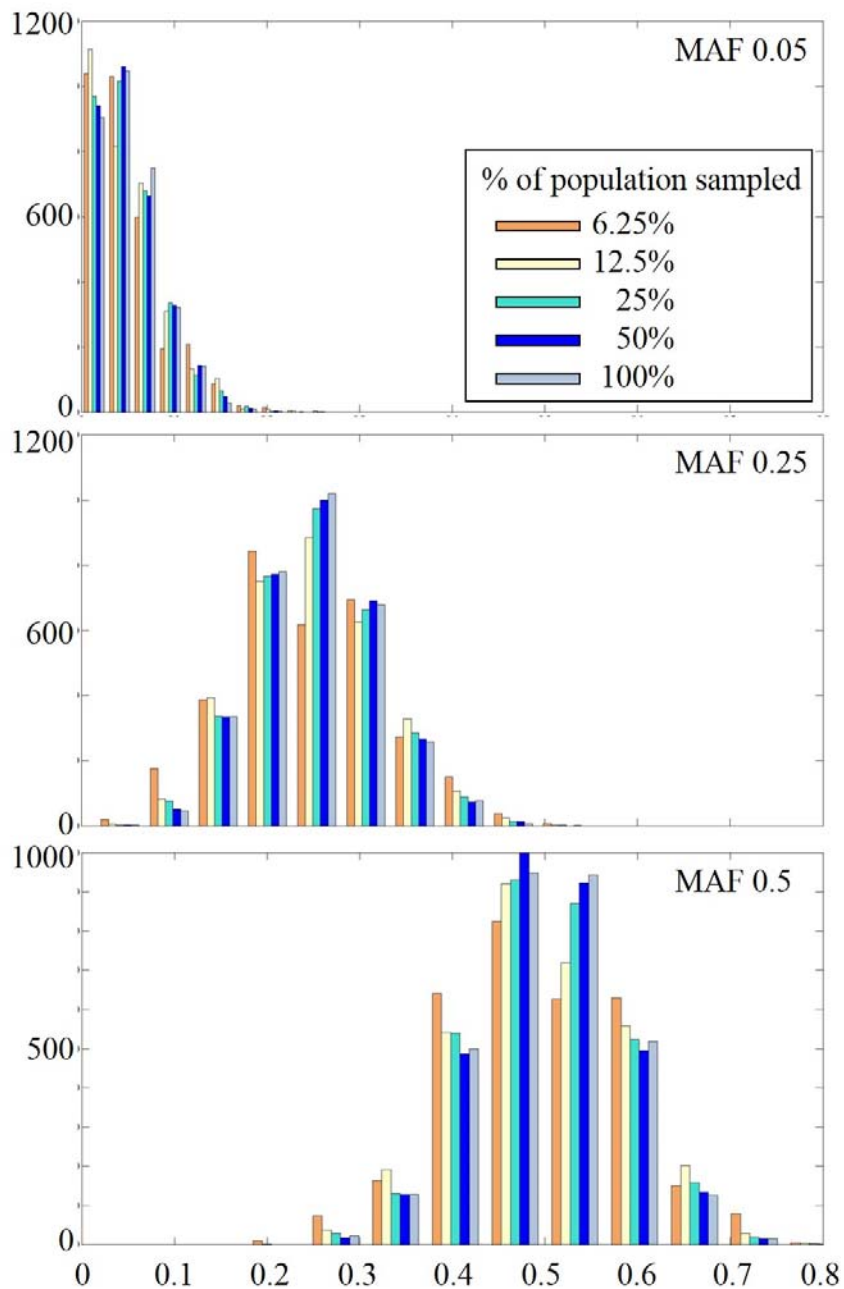

**Figure S6:** Allele frequency distribution after 100 time steps of the SNP allele with indicated minor allele frequency (MAF) at the start of the simulations. Results of single simulations are shown (3200 SNP loci, promiscuous population). Different colors represent allele frequency estimates of different proportions of the population sampled.
