# Supplementary material for: How Well Do Molecular and Pedigree Relatedness Correspond, in Populations with Diverse Mating Systems, and Various Types and Quantities of Molecular and Demographic Data?
Source: Oxford University Press journal article supplement (doi:10.1534/g3.115.019323), 2015-07-02
Supplement: 019323_figures11.pdf [file 019323_figures11.pdf]

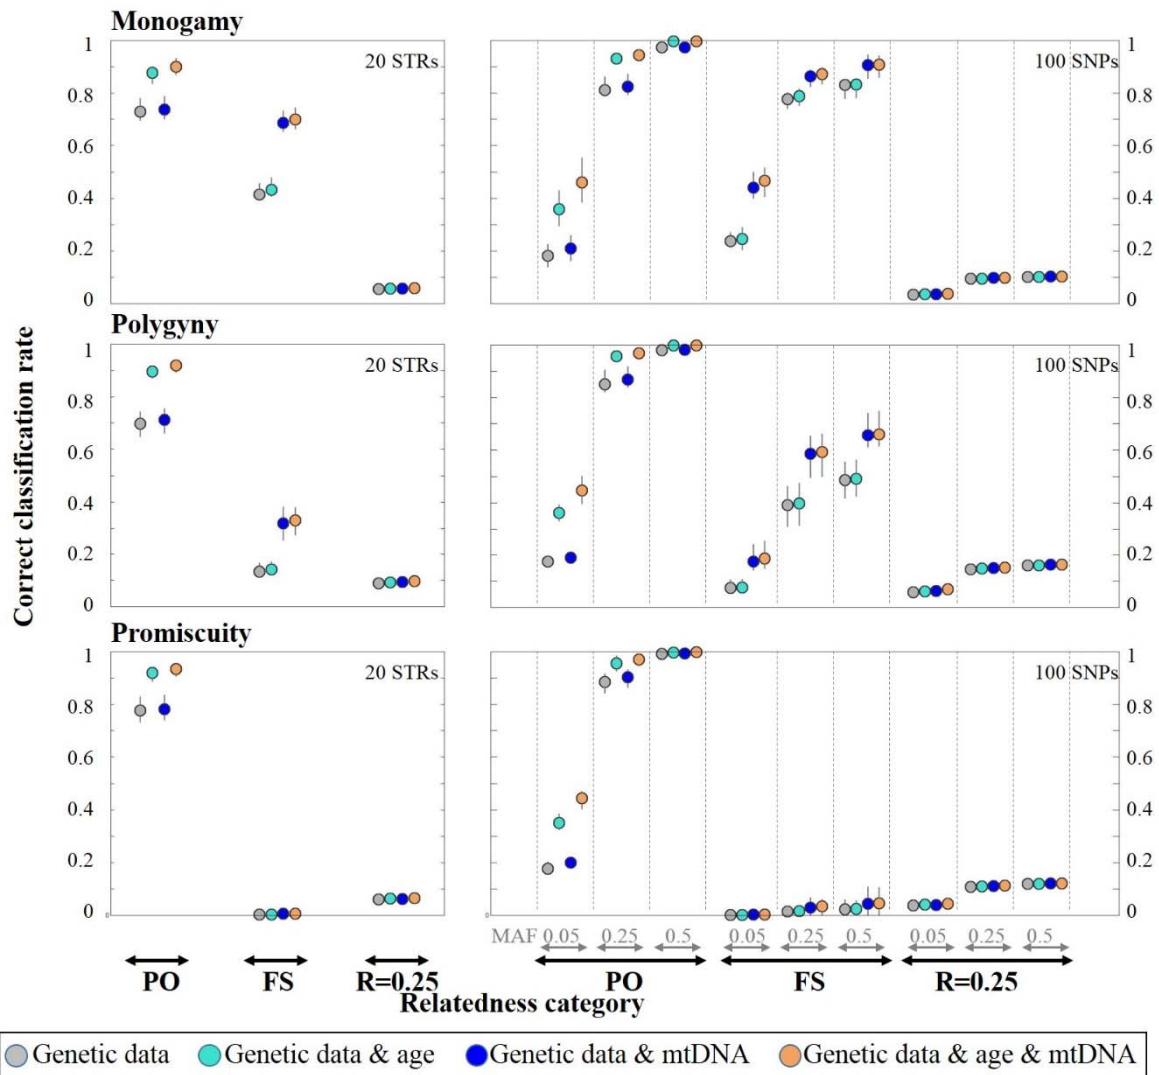

**Figure S11:** Effect of additional data on correct classification rates of relatedness category assignment in three different mating systems using 20 STR and 100 SNP loci, respectively. In addition to age and/or mtDNA haplotype the sex of the individuals was known too. Plotted are mean and range of correct classification rates based on 10 independent simulations.

## REFERENCES

- Bellows, T. S., 1981 The Descriptive Properties of Some Models for Density Dependence. *Journal of Animal Ecology* 50: 139-156.
- Beverton, R. J. H., and S. J. Holt, 1957 *On the dynamics of exploited fish populations*. Her Majesty's Stationery Office, London.
- Ellegren, H., 2000 Microsatellite mutations in the germline: implications for evolutionary inference. *Trends in Genetics* 16: 551-558.
- Maynard Smith, J., and M. Slatkin, 1973 The Stability of Predator-Prey Systems. *Ecology* 54: 384-391.
