# Supplementary material for: How Well Do Molecular and Pedigree Relatedness Correspond, in Populations with Diverse Mating Systems, and Various Types and Quantities of Molecular and Demographic Data?
Source: Oxford University Press journal article supplement (doi:10.1534/g3.115.019323), 2015-07-02
Supplement: 019323_tables1.pdf [file 019323_tables1.pdf]

## SUPPLEMENTARY INFORMATION

### How well do molecular and pedigree relatedness correspond, in populations with variable mating systems, and types and quantities of molecular and demographic data?

Anna M. Kopps, Jungkoo Kang, William B. Sherwin and Per J. Palsbøll

#### *Modelled Scenarios*

The population size was kept constant using a Beverton-Holt function (Beverton and Holt 1957; Maynard Smith and Slatkin 1973; Bellows 1981). Mutations were not implemented in the simulation because effects of mutations are negligible for the time frame over which the simulations were run (Ellegren 2000).

**Table S1:** Parameter values used in the model. RCA Relatedness Category Assignment; MAF Minor Allele Frequency; PO parent-offspring; FS full siblings; R=0.25 avuncular, half sibs, grand-parent-grand offspring; R=0.125 full cousins, half avuncular; R=0.0625 half first cousins, first cousins once removed, double second cousins; unrel unrelated; No. number

| Parameter                                              | Classes                                                            | Value                                                          |
|--------------------------------------------------------|--------------------------------------------------------------------|----------------------------------------------------------------|
| Mating system scenarios                                | monogamy, polygyny, promiscuity                                    |                                                                |
| No. of simulations/scenario                            |                                                                    | 10                                                             |
| No. of time steps/simulation before performing the RCA |                                                                    | 100                                                            |
| Initial population size                                |                                                                    | 600                                                            |
| No. of overlapping generations                         |                                                                    | 3                                                              |
| Age class at first reproduction                        |                                                                    | 4                                                              |
| Max. age class                                         |                                                                    | 12                                                             |
| Overlapping generations                                | Mean no. of offspring per female/time step (Poisson distribution)  | monogamy<br>polygyny<br>promiscuity                            |
|                                                        |                                                                    | age class 1                                                    |
|                                                        |                                                                    | age class 2-3                                                  |
|                                                        |                                                                    | age class 4-6                                                  |
|                                                        |                                                                    | age class 7-9                                                  |
|                                                        |                                                                    | age class 10-12                                                |
|                                                        |                                                                    |                                                                |
| Mortality rates                                        |                                                                    | 0.97<br>0.73<br>0.78<br>0.31<br>0.103<br>0.065<br>0.13<br>0.26 |
| No. of SNP loci simulated                              | 50, 100, 200, 400, 800, 1600, 3200 (single simulations with 50000) |                                                                |
| No. of STR loci simulated                              | 10, 20, 40, 80                                                     |                                                                |
| No. of SNP loci combined with 20 STR loci simulated    | 50, 100, 200, 400, 800, 1600, 3200 (single simulations with 50000) |                                                                |
| Mean MAF (SNP only) simulated                          | 0.05, 0.25, 0.5                                                    |                                                                |
| Proportion of population sampled                       | 1; for some simulations 0.5, 0.25, 0.125, 0.0625                   |                                                                |

|                                    |                                                                           |                                                                                                                         |   |
|------------------------------------|---------------------------------------------------------------------------|-------------------------------------------------------------------------------------------------------------------------|---|
|                                    | Sex ratio at start of simulation/probability for male (female) offspring  | 1:1/ 0.5 (0.5)                                                                                                          |   |
|                                    | mtDNA haplotypes known                                                    | yes, when indicated                                                                                                     |   |
|                                    | No. of unifrequent mtDNA haplotypes                                       | 5                                                                                                                       |   |
|                                    | Age class known                                                           | yes, when indicated                                                                                                     |   |
|                                    | Sex known                                                                 | Yes, when mtDNA haplotype and/or age class known                                                                        |   |
|                                    | Mating system scenarios                                                   | monogamy, polygyny, promiscuity                                                                                         |   |
|                                    | Relatedness categories used                                               | PO, FS, R=0.25, R=0.125, unrel                                                                                          |   |
|                                    | No. of time steps/simulation before performing the RCA                    | 10                                                                                                                      |   |
|                                    | No. of simulations/scenario                                               | 10                                                                                                                      |   |
|                                    | Initial population size                                                   | 600                                                                                                                     |   |
|                                    | No. of overlapping generations                                            | 1                                                                                                                       |   |
|                                    | Age class at first reproduction                                           | 1                                                                                                                       |   |
|                                    | Max. age class                                                            | 1                                                                                                                       |   |
| <b>Non-overlapping generations</b> | Mean no. of offspring per / time step (Poisson distribution)              | monogamy                                                                                                                | 4 |
|                                    |                                                                           | polygyny                                                                                                                | 4 |
|                                    |                                                                           | promiscuity                                                                                                             | 4 |
|                                    | Mortality rates                                                           | 550-650 randomly chosen offspring survived each time step to produce the next generation in all mating system scenarios |   |
|                                    | No. of SNP loci simulated                                                 | 50, 100, 200, 400, 800, 1600, 3200                                                                                      |   |
|                                    | No. of STR loci simulated                                                 | 10, 20, 40, 80                                                                                                          |   |
|                                    | No. of SNP loci combined with 20 STR loci simulated                       | 50, 100, 200, 400, 800, 1600, 3200                                                                                      |   |
|                                    | Mean MAF (SNP only) simulated                                             | 0.05, 0.25, 0.5                                                                                                         |   |
|                                    | Relatedness categories used                                               | PO, FS, R=0.25, R=0.125, unrel                                                                                          |   |
|                                    | Proportion of population sampled                                          | 1                                                                                                                       |   |
|                                    | Sex ration at start of simulation/probability for male (female) offspring | 1:1/ 0.5 (0.5)                                                                                                          |   |
|                                    | mtDNA haplotypes known                                                    | no                                                                                                                      |   |
|                                    | No. of unifrequent mtDNA haplotypes                                       | n/a                                                                                                                     |   |
|                                    | Age class known                                                           | no                                                                                                                      |   |
| Sex known                          | no                                                                        |                                                                                                                         |   |
