# Supplementary material for: How Well Do Molecular and Pedigree Relatedness Correspond, in Populations with Diverse Mating Systems, and Various Types and Quantities of Molecular and Demographic Data?
Source: Oxford University Press journal article supplement (doi:10.1534/g3.115.019323), 2015-07-02
Supplement: 019323_tables2.pdf [file 019323_tables2.pdf]

**Table S2:** Correct classification rate of relationship category assignment. For each category, the lowest number of loci (No. Loci) is shown, where the mean correct classification rate exceeded 0.95 (95% correct classification rate, Figures 1, S1, S2). Numbers are based on 10 independent simulations.

| Mating System | Marker  | MAF   | PO    |       |       |         | FS    |       |       |         | R=0.25 |       |       |         | unrel |       |       |         |
|---------------|---------|-------|-------|-------|-------|---------|-------|-------|-------|---------|--------|-------|-------|---------|-------|-------|-------|---------|
|               |         |       | min   | max   | Mdn   | No Loci | min   | max   | Mdn   | No Loci | min    | max   | Mdn   | No Loci | min   | max   | Mdn   | No Loci |
| Monogamy      | SNP     | 0.05  | 0.988 | 1     | 0.993 | 3200    | 0.964 | 0.994 | 0.982 | 1600    | 0.929  | 0.977 | 0.950 | 3200    | 0.990 | 0.993 | 0.991 | 50      |
|               |         | 0.25  | 0.964 | 0.984 | 0.976 | 200     | 0.933 | 0.980 | 0.965 | 200     | 0.960  | 0.990 | 0.976 | 1600    | 0.993 | 0.994 | 0.994 | 50      |
|               |         | 0.5   | 0.941 | 0.979 | 0.969 | 100     | 0.939 | 0.983 | 0.967 | 200     | 0.958  | 0.988 | 0.976 | 1600    | 0.992 | 0.995 | 0.993 | 50      |
|               | STR     | n/a   | 0.992 | 0.998 | 0.995 | 80      | 0.951 | 0.987 | 0.974 | 80      | -      | -     | -     | -       | 0.992 | 0.994 | 0.993 | 10      |
|               | SNP&STR | 0.05  | 0.929 | 0.966 | 0.954 | 800     | 0.971 | 0.995 | 0.981 | 800     | 0.936  | 0.978 | 0.951 | 3200    | 0.995 | 0.996 | 0.995 | 50      |
|               |         | 0.25  | 0.952 | 0.978 | 0.969 | 100     | 0.957 | 0.990 | 0.982 | 200     | 0.964  | 0.992 | 0.977 | 1600    | 0.995 | 0.997 | 0.996 | 50      |
| 0.5           |         | 0.982 | 0.995 | 0.989 | 100   | 0.947   | 0.993 | 0.979 | 200   | 0.958   | 0.991  | 0.975 | 1600  | 0.995   | 0.997 | 0.996 | 50    |         |
| Polygyny      | SNP     | 0.05  | 0.959 | 0.989 | 0.983 | 1600    | 0.942 | 0.992 | 0.965 | 3200    | 0.976  | 0.985 | 0.982 | 3200    | 0.988 | 0.990 | 0.989 | 50      |
|               |         | 0.25  | 0.986 | 1     | 0.994 | 200     | 0.922 | 1     | 0.966 | 800     | 0.940  | 0.961 | 0.953 | 800     | 0.992 | 0.993 | 0.992 | 50      |
|               |         | 0.5   | 0.959 | 0.987 | 0.977 | 100     | 0.921 | 0.991 | 0.968 | 400     | 0.939  | 0.969 | 0.955 | 800     | 0.991 | 0.993 | 0.992 | 50      |
|               | STR     | n/a   | 0.986 | 1     | 0.997 | 80      | -     | -     | -     | -       | -      | -     | -     | -       | 0.990 | 0.992 | 0.991 | 10      |
|               | SNP&STR | 0.05  | 0.933 | 0.970 | 0.953 | 400     | 0.929 | 1     | 0.951 | 1600    | 0.946  | 0.960 | 0.956 | 1600    | 0.994 | 0.995 | 0.995 | 50      |
|               |         | 0.25  | 0.968 | 0.993 | 0.979 | 100     | 0.907 | 1     | 0.966 | 800     | 0.949  | 0.967 | 0.955 | 800     | 0.995 | 0.996 | 0.995 | 50      |

|             |         |       |       |       |       |       |   |       |     |       |       |       |       |       |       |       |       |    |
|-------------|---------|-------|-------|-------|-------|-------|---|-------|-----|-------|-------|-------|-------|-------|-------|-------|-------|----|
|             | 0.5     | 0.938 | 0.980 | 0.964 | 50    | 0.924 | 1 | 0.972 | 400 | 0.952 | 0.975 | 0.959 | 800   | 0.994 | 0.996 | 0.995 | 50    |    |
|             | 0.05    | 0.978 | 0.993 | 0.982 | 800   | -     | - | -     | -   | 0.972 | 0.982 | 0.979 | 3200  | 0.990 | 0.992 | 0.991 | 50    |    |
| Promiscuity | SNP     | 0.25  | 0.985 | 1     | 0.996 | 200   | - | -     | -   | -     | 0.973 | 0.992 | 0.982 | 1600  | 0.992 | 0.995 | 0.994 | 50 |
|             |         | 0.5   | 0.984 | 1     | 0.993 | 100   | - | -     | -   | -     | 0.977 | 0.994 | 0.981 | 1600  | 0.993 | 0.996 | 0.994 | 50 |
|             |         | n/a   | 0.964 | 0.992 | 0.977 | 40    | - | -     | -   | -     | -     | -     | -     | -     | 0.991 | 0.993 | 0.993 | 10 |
|             | SNP&STR | 0.05  | 0.937 | 0.971 | 0.957 | 200   | - | -     | -   | -     | 0.972 | 0.985 | 0.979 | 3200  | 0.995 | 0.996 | 0.995 | 50 |
|             |         | 0.25  | 0.947 | 0.977 | 0.957 | 50    | - | -     | -   | -     | 0.975 | 0.991 | 0.982 | 1600  | 0.996 | 0.997 | 0.996 | 50 |
|             |         | 0.5   | 0.963 | 0.991 | 0.978 | 50    | - | -     | -   | -     | 0.938 | 0.970 | 0.955 | 800   | 0.996 | 0.997 | 0.996 | 50 |

Min minimum correct classification rate, max maximum correct classification rate, Mdn median, MAF minor allele frequency, PO parent-offspring, R=0.25 avuncular, half sibs, grand-parent-grand offspring, unrel unrelated, SNP&STR number of SNP loci required when combined with 20 STR loci. Dashes indicate that the category could not be assigned with a >95% correct classification rate with the simulated number of loci.
