# Supplementary material for: How Well Do Molecular and Pedigree Relatedness Correspond, in Populations with Diverse Mating Systems, and Various Types and Quantities of Molecular and Demographic Data?
Source: Oxford University Press journal article supplement (doi:10.1534/g3.115.019323), 2015-07-02
Supplement: 019323_tables3.pdf [file 019323_tables3.pdf]

**Table S3:** Not considering R=0.125: minimum number of SNP and/or STR loci required per category for a relatedness category assignment with a >95% (>80%) correct classification rate without considering the category R=0.125.

| Mating System      | Marker               | MAF      | PO         | FS          | R=0.25 | Unrel <sup>1</sup> |
|--------------------|----------------------|----------|------------|-------------|--------|--------------------|
| <b>Monogamy</b>    | SNP                  | 0.05     | 3200 (800) | 1600 (800)  | --     | 50                 |
|                    |                      | 0.25     | 200 (100)  | 200 (200)   | --     | 50                 |
|                    |                      | 0.5      | 100 (100)  | 200 (100)   | --     | 50                 |
|                    | STR                  | n/a      | 80 (40)    | 80 (40)     | --     | 10                 |
|                    | SNP&STR <sup>2</sup> | 0.05     | 800 (100)  | 400 (100)   | --     | 50                 |
|                    |                      | 0.25     | 100 (50)   | 200 (50)    | --     | 50                 |
| 0.5                |                      | 100 (50) | 100 (50)   | --          | 50     |                    |
| <b>Polygyny</b>    | SNP                  | 0.05     | 1600 (400) | 3200 (1600) | --     | 50                 |
|                    |                      | 0.25     | 200 (100)  | 400 (400)   | --     | 50                 |
|                    |                      | 0.5      | 100 (100)  | 400 (200)   | --     | 50                 |
|                    | STR                  | n/a      | 80 (40)    | - (80)      | --     | 10                 |
|                    | SNP&STR              | 0.05     | 400 (100)  | 1600 (800)  | --     | 50                 |
|                    |                      | 0.25     | 100 (50)   | 400 (200)   | --     | 50                 |
| 0.5                |                      | 50 (50)  | 400 (200)  | --          | 50     |                    |
| <b>Promiscuity</b> | SNP                  | 0.05     | 800 (400)  | -           | --     | 50                 |
|                    |                      | 0.25     | 200 (100)  | -           | --     | 50                 |
|                    |                      | 0.5      | 100 (100)  | -           | --     | 50                 |
|                    | STR                  | n/a      | 40 (40)    | -           | --     | 10                 |
|                    | SNP&STR              | 0.05     | 200 (50)   | -           | --     | 50                 |
|                    |                      | 0.25     | 50 (50)    | -           | --     | 50                 |
| 0.5                |                      | 50 (50)  | -          | --          | 50     |                    |

Dashes indicate that the category could not be assigned with a >95% (80%) correct classification rate with the simulated number of loci. MAF minor allele frequency, PO parent-offspring, FS full siblings, R=0.25 avuncular, half sibs, grand-parent-grand offspring, unrel unrelated. <sup>1</sup>Note that with the population size and parameters used, more than >95% of individuals are unrelated, so even if all dyads were assigned to the category 'unrelated' the correct classification rate might be >95%. <sup>2</sup>Number of SNP loci required when combined with 20 STR loci.
