# Supplementary material for: How Well Do Molecular and Pedigree Relatedness Correspond, in Populations with Diverse Mating Systems, and Various Types and Quantities of Molecular and Demographic Data?
Source: Oxford University Press journal article supplement (doi:10.1534/g3.115.019323), 2015-07-02
Supplement: 019323_tables4.pdf [file 019323_tables4.pdf]

**Table S4:** Considering R=0.0625: minimum number of SNP loci or SNP loci combined with 20 STR loci required per category for a relatedness category assignment (RCA) with >95% (>80%) correct classification rates. For the simulations shown in this table the category R=0.0625 was assessed. STR only results are not shown because they did not change compared to simulations without R=0.0625 (Table 2).

| Mating System | Marker               | MAF  | PO         | FS          | R=0.25      | R=0.125 <sup>1</sup> | R=0.0625 <sup>1</sup> | unrel <sup>2</sup> |
|---------------|----------------------|------|------------|-------------|-------------|----------------------|-----------------------|--------------------|
| Monogamy      | SNP                  | 0.05 | 3200 (800) | 1600 (800)  | 3200 (1600) | - -                  | --                    | 50                 |
|               |                      | 0.25 | 200 (200)  | 200 (200)   | 1600 (800)  | - -                  | --                    | 50                 |
|               |                      | 0.5  | 100 (100)  | 200 (100)   | 1600 (800)  | - -                  | --                    | 50                 |
|               | SNP&STR <sup>3</sup> | 0.05 | 1600 (100) | 800 (200)   | 3200 (1600) | - -                  | --                    | 50                 |
|               |                      | 0.25 | 100 (50)   | 200 (50)    | 1600 (800)  | - -                  | --                    | 50                 |
|               |                      | 0.5  | 100 (50)   | 200 (50)    | 1600 (800)  | - -                  | --                    | 50                 |
| Polygyny      | SNP                  | 0.05 | 1600 (800) | 3200 (1600) | 3200 (800)  | - -                  | --                    | 50                 |
|               |                      | 0.25 | 200 (100)  | 400 (400)   | 800 (400)   | - (3200)             | --                    | 50                 |
|               |                      | 0.5  | 100 (100)  | 400 (200)   | 800 (400)   | - (3200)             | --                    | 50                 |
|               | SNP&STR              | 0.05 | 800 (100)  | 1600 (800)  | 3200 (800)  | - -                  | --                    | 50                 |
|               |                      | 0.25 | 100 (50)   | 400 (200)   | 800 (400)   | - (3200)             | --                    | 50                 |
|               |                      | 0.5  | 100 (50)   | 400 (200)   | 800 (400)   | - (3200)             | --                    | 50                 |
| Promiscuity   | SNP                  | 0.05 | 800 (400)  | - -         | 3200 (800)  | - (3200)             | --                    | 50                 |
|               |                      | 0.25 | 200 (100)  | - -         | 1600 (400)  | - (3200)             | --                    | 50                 |
|               |                      | 0.5  | 100 (100)  | - -         | 800 (400)   | - (1600)             | --                    | 50                 |
|               | SNP&STR              | 0.05 | 200 (50)   | - -         | 3200 (800)  | - (3200)             | --                    | 50                 |
|               |                      | 0.25 | 100 (50)   | - -         | 1600 (400)  | - (1600)             | --                    | 50                 |
|               |                      | 0.5  | 50 (50)    | - -         | 800 (400)   | - (1600)             | --                    | 50                 |

Dashes indicate that the category could not be assigned with a >95% (80%) correct classification rate with the simulated number of loci. MAF minor allele frequency, PO parent-offspring, FS full siblings, R=0.25 avuncular, half sibs, grand-parent-grand offspring, R=0.125 full cousins, half avuncular, unrel unrelated. <sup>1</sup>Even though no number of tested loci led to a 95% correct classification rate for the R=0.125 and R=0.0625 categories

under the simulated population conditions these categories are part of this table because it may be important to include them in the RCA. <sup>2</sup>Note that with the population size and parameters used, more than >95% of individuals are unrelated, so even if all dyads were assigned to the category 'unrelated' the correct classification rate might be >95%. <sup>3</sup>Number of SNP loci required when combined with 20 STR loci.
