# Supplementary material for: How Well Do Molecular and Pedigree Relatedness Correspond, in Populations with Diverse Mating Systems, and Various Types and Quantities of Molecular and Demographic Data?
Source: Oxford University Press journal article supplement (doi:10.1534/g3.115.019323), 2015-07-02
Supplement: 019323_tables5.pdf [file 019323_tables5.pdf]

**Table S5:** Effect of typing error: minimum number of SNP and/or STR loci with 2% typing error required per category for a relatedness category assignment with >95% correct classification rates.

| Mating System | Marker               | MAF  | PO   | FS   | R=0.25 | R=0.125 <sup>1</sup> | Unrelated <sup>2</sup> |    |
|---------------|----------------------|------|------|------|--------|----------------------|------------------------|----|
| Monogamy      | SNP                  | 0.05 | -    | 3200 | 3200   | -                    | 50                     |    |
|               |                      | 0.25 | 400  | 400  | 3200   | -                    | 50                     |    |
|               |                      | 0.5  | 400  | 400  | 3200   | -                    | 50                     |    |
|               | STR                  | n/a  | 80   | 80   | -      | -                    | 10                     |    |
|               | SNP&STR <sup>3</sup> | 0.05 | 1600 | 1600 | 3200   | -                    | 10                     |    |
|               |                      | 0.25 | 200  | 200  | 3200   | -                    | 50                     |    |
|               |                      | 0.5  | 200  | 200  | 1600   | -                    | 50                     |    |
|               | Polygyny             | SNP  | 0.05 | 1600 | -      | 1600                 | -                      | 50 |
|               |                      |      | 0.25 | 400  | 800    | 1600                 | -                      | 50 |
| 0.5           |                      |      | 400  | 800  | 1600   | -                    | 50                     |    |
| STR           |                      | n/a  | 40   | -    | -      | -                    | 10                     |    |
| SNP&STR       |                      | 0.05 | 400  | -    | 1600   | -                    | 50                     |    |
|               |                      | 0.25 | 200  | 400  | 1600   | -                    | 50                     |    |
|               |                      | 0.5  | 200  | 800  | 1600   | -                    | 50                     |    |
| Promiscuity   |                      | SNP  | 0.05 | 800  | -      | 1600                 | -                      | 50 |
|               |                      |      | 0.25 | 400  | -      | 1600                 | -                      | 50 |
|               | 0.5                  |      | 200  | -    | 1600   | -                    | 50                     |    |
|               | STR                  | n/a  | 40   | -    | -      | -                    | 10                     |    |
|               | SNP&STR              | 0.05 | 400  | -    | 1600   | -                    | 50                     |    |
|               |                      | 0.25 | 100  | -    | 1600   | -                    | 50                     |    |
|               |                      | 0.5  | 100  | -    | 1600   | -                    | 50                     |    |

Dashes indicate that the category could not be assigned with a >95% correct classification rate with the simulated number of loci. MAF minor allele frequency, PO parent-offspring, FS full siblings, R=0.25 avuncular, half sibs, grand-parent-grand offspring, R=0.125 full cousins, half avuncular. <sup>1</sup>Even though no number of tested loci led to a 95% correct classification rate for the R=0.125 category under the simulated population conditions; R=0.125 is part of this table because it is important to include it in the relatedness category assignment for the correct classification rate of R=0.25. <sup>2</sup>Note that with the population size and parameters used, more than >95% of individuals are unrelated, so even if all dyads were assigned to the category 'unrelated' the correct classification rate might be >95%. <sup>3</sup>Number of SNP loci required when combined with 20 STR loci.
