# Supplementary material for: How Well Do Molecular and Pedigree Relatedness Correspond, in Populations with Diverse Mating Systems, and Various Types and Quantities of Molecular and Demographic Data?
Source: Oxford University Press journal article supplement (doi:10.1534/g3.115.019323), 2015-07-02
Supplement: 019323_tables6.pdf [file 019323_tables6.pdf]

**Table S6:** Non-overlapping generations: minimum number of SNP and/or SNP loci required per category for a relatedness category assignment with >95% correct classification rates.

| Mating System      | Marker               | MAF  | PO  | FS   | R=0.25 | R=0.125 <sup>1</sup> | unrel <sup>2</sup> |
|--------------------|----------------------|------|-----|------|--------|----------------------|--------------------|
| <b>Monogamy</b>    | SNP                  | 0.05 | -   | 400  | -      | -                    | 50                 |
|                    |                      | 0.25 | -   | 200  | -      | -                    | 50                 |
|                    |                      | 0.5  | -   | 200  | -      | -                    | 50                 |
|                    | STR                  | n/a  | -   | 40   | -      | -                    | 10                 |
|                    | SNP&STR <sup>3</sup> | 0.05 | -   | 200  | -      | -                    | 50                 |
|                    |                      | 0.25 | -   | 50   | -      | -                    | 50                 |
| 0.5                |                      | -    | 50  | -    | -      | 50                   |                    |
| <b>Polygyny</b>    | SNP                  | 0.05 | -   | 800  | 1600   | -                    | 50                 |
|                    |                      | 0.25 | -   | 400  | 800    | -                    | 50                 |
|                    |                      | 0.5  | -   | 200  | 800    | -                    | 50                 |
|                    | STR                  | n/a  | -   | -    | -      | -                    | 10                 |
|                    | SNP&STR              | 0.05 | -   | 800  | 1600   | -                    | 50                 |
|                    |                      | 0.25 | -   | 200  | 800    | -                    | 50                 |
| 0.5                |                      | -    | 200 | 800  | -      | 50                   |                    |
| <b>Promiscuity</b> | SNP                  | 0.05 | -   | 3200 | 800    | -                    | 50                 |
|                    |                      | 0.25 | -   | 800  | 400    | -                    | 50                 |
|                    |                      | 0.5  | -   | 800  | 400    | -                    | 50                 |
|                    | STR                  | n/a  | -   | -    | -      | -                    | 10                 |
|                    | SNP&STR              | 0.05 | -   | 3200 | 800    | -                    | 50                 |
|                    |                      | 0.25 | -   | 800  | 400    | -                    | 50                 |
| 0.5                |                      | -    | 800 | 400  | -      | 50                   |                    |

Dashes indicate that the category could not be assigned with a >95% correct classification rate with the simulated number of loci. MAF minor allele frequency, PO parent-offspring, FS full siblings, R=0.25 avuncular, half sibs, grand-parent-grand offspring, R=0.125 full cousins, half avuncular, unrel unrelated. <sup>1</sup>Even though no number of tested loci led to a 95% correct classification rate for the R=0.125 and R=0.0625 categories under the simulated population conditions these categories are part of this table because it may be important to include them in the relatedness category assignment. <sup>2</sup>Note that with the population size and parameters used, more than >95% of individuals are unrelated, so even if all dyads were assigned to the category 'unrelated' the correct classification rate might be >95%. <sup>3</sup>Number of SNP loci required when combined with 20 STR loci.
